# Supplementary material
Source: HighWire-hosted journal article supplement (https://bmjopen.bmj.com/content/9/6/e029160)
Supplement: inline-supplementary-material-1 [file inline-supplementary-material-1.pdf]

## PUBMED SEARCH Strategies

| Search              | Query                                                                                                                                                                                                                                          | Items found            | Time     |
|---------------------|------------------------------------------------------------------------------------------------------------------------------------------------------------------------------------------------------------------------------------------------|------------------------|----------|
| <a href="#">#15</a> | #14 Filters: <b>English</b>                                                                                                                                                                                                                    | <a href="#">315</a>    | 23:48:32 |
| <a href="#">#14</a> | #13 Filters: <b>Humans</b>                                                                                                                                                                                                                     | <a href="#">352</a>    | 23:42:15 |
| <a href="#">#13</a> | #5 AND # 9 AND #12                                                                                                                                                                                                                             | <a href="#">389</a>    | 23:42:09 |
| <a href="#">#12</a> | #10 OR #11                                                                                                                                                                                                                                     | <a href="#">482836</a> | 23:41:17 |
| <a href="#">#11</a> | Search ( <b>need*[Title] OR demand*[Title] OR requirement*[Title] OR wish*[Title] OR experience[Title] OR challenge*[Title]</b> )                                                                                                              | <a href="#">442378</a> | 23:40:28 |
| <a href="#">#10</a> | Search ( <b>Health Services Needs and Demand[MeSH Terms]</b> )                                                                                                                                                                                 |                        |          |
| <a href="#">#9</a>  | #6 OR #7 OR #8                                                                                                                                                                                                                                 | <a href="#">925190</a> | 23:36:16 |
| <a href="#">#8</a>  | Search ( <b>Community[Title/Abstract] OR Home[Title/Abstract] OR Outpatient*[Title/Abstract]</b> )                                                                                                                                             | <a href="#">728095</a> | 23:35:31 |
| <a href="#">#7</a>  | Search <b>Outpatients[MeSH Terms]</b>                                                                                                                                                                                                          | <a href="#">13862</a>  | 23:33:14 |
| <a href="#">#6</a>  | Search (( <b>Community Health Services[MeSH Terms]</b> ) OR <b>Home Health Nursing[MeSH Terms]</b> ) OR <b>Home Nursing[MeSH Terms]</b> )                                                                                                      | <a href="#">283066</a> | 23:25:43 |
| <a href="#">#5</a>  | #1 OR #2 OR #3 OR #4                                                                                                                                                                                                                           | <a href="#">270387</a> | 23:23:40 |
| <a href="#">#4</a>  | Search (( <b>cerebral[Title] OR cerebellar[Title] OR brain*[Title] OR vertebrobasilar[Title]</b> )) AND ( <b>accident*[Title] OR hemorrhag*[Title]</b> )                                                                                       | <a href="#">8234</a>   | 23:23:14 |
| <a href="#">#3</a>  | Search (( <b>cerebral[Title] OR cerebellar[Title] OR brain*[Title] OR vertebrobasilar[Title]</b> )) AND ( <b>infarct*[Title] OR ischemi*[Title] OR thrombo*[Title] OR apoplexy[Title] OR emboli*[Title]</b> )                                  | <a href="#">38477</a>  | 23:21:52 |
| <a href="#">#2</a>  | Search (((((( <b>cva*[Title] OR stroke*[Title] OR poststroke*[Title] OR post-stroke*[Title] OR post stroke*[Title] OR transient ischemic attack*[Title] OR TIA*[Title] OR ministroke*[Title] OR mini stroke*[Title] OR SAH[Title]</b> ))))))   | <a href="#">96618</a>  | 23:19:45 |
| <a href="#">#1</a>  | Search (((( <b>Stroke[MeSH Terms]</b> ) OR <b>Basal Ganglia Hemorrhage[MeSH Terms]</b> ) OR <b>Brain Ischemia[MeSH Terms]</b> ) OR ( <b>Intracranial Embolism and Thrombosis[MeSH Terms]</b> )) OR <b>Intracranial Hemorrhages[MeSH Terms]</b> | <a href="#">230804</a> | 23:09:26 |
